# Supplementary material
Source: PubMed Central journal article supplement (PMC3864471)

**Fig. 1S** Classifications based on weight gain and birth weight percentiles calculated from the total study population for women with a height of 162-171 cm and their neonates. Details are analogous to the description in the legend to Fig. 1 (in the main paper).

**Supplemental Online Figure 1a**

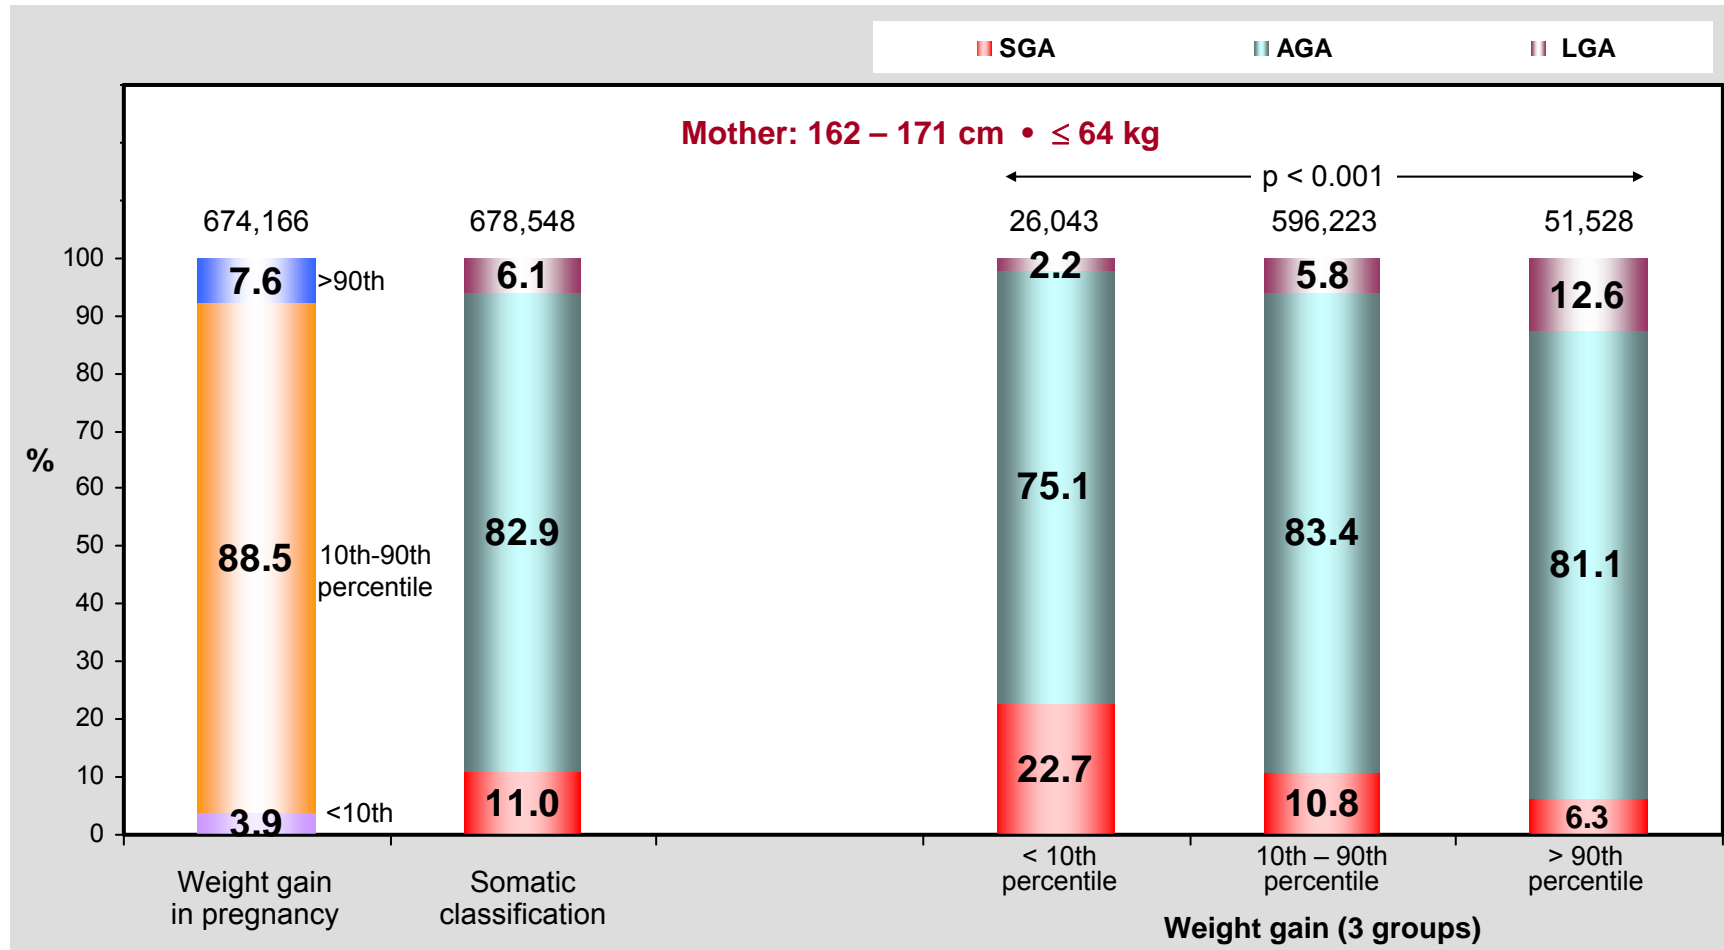

Supplemental Online Figure 1b

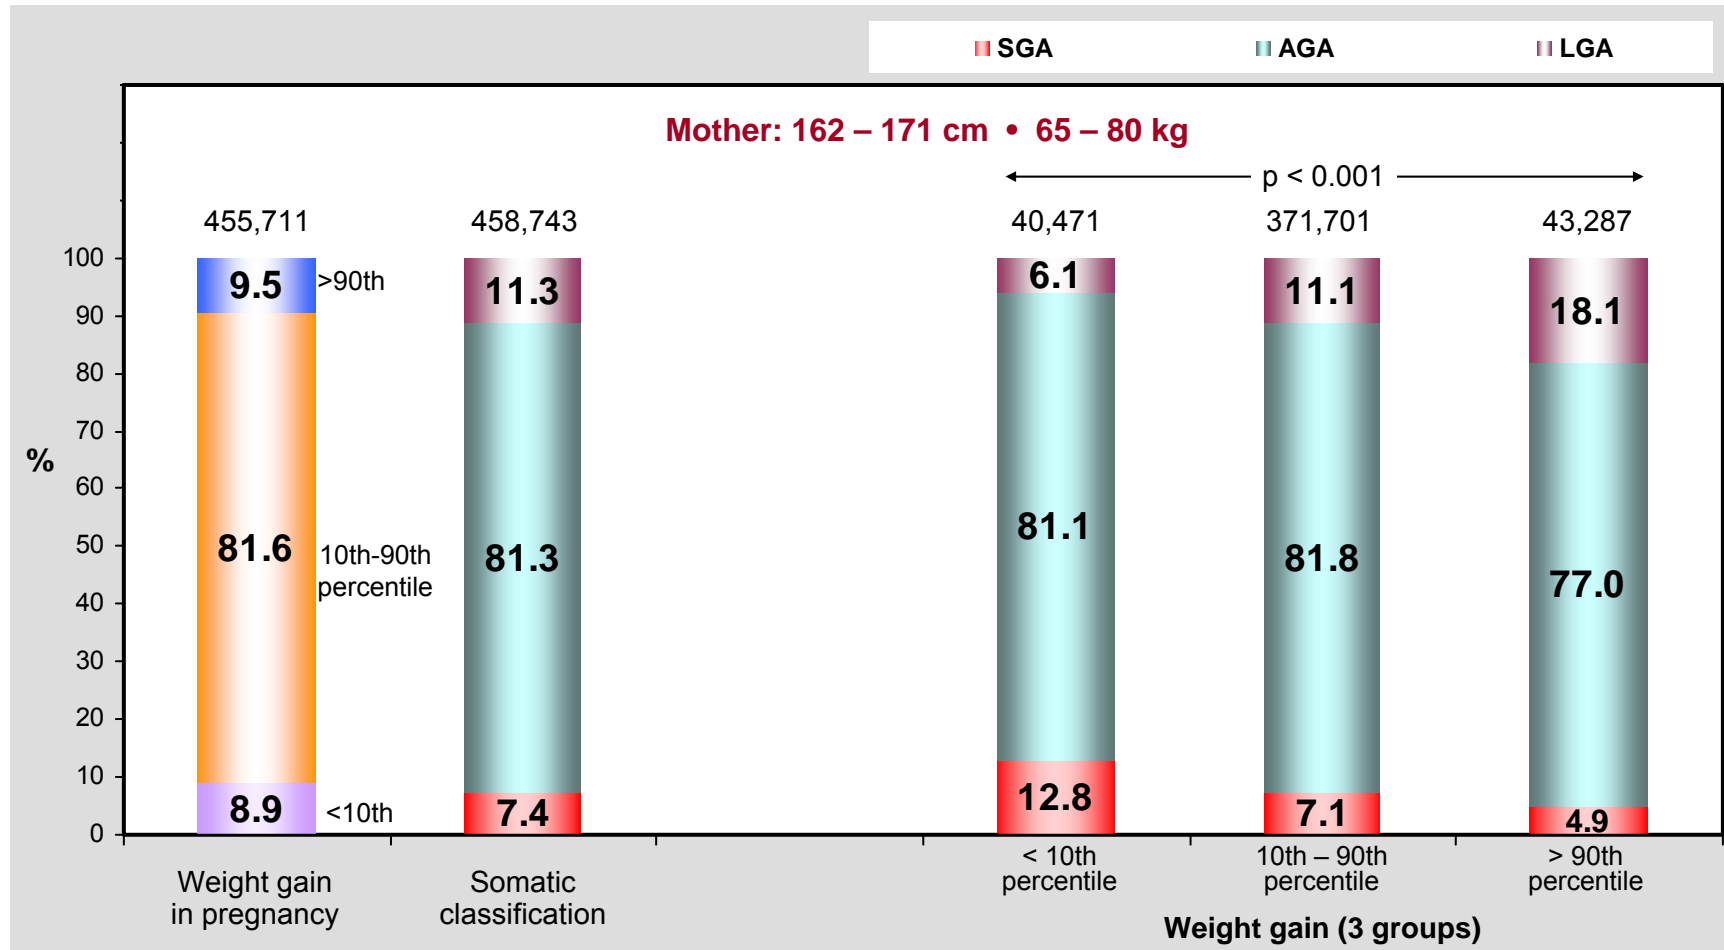

Supplemental Online Figure 1c

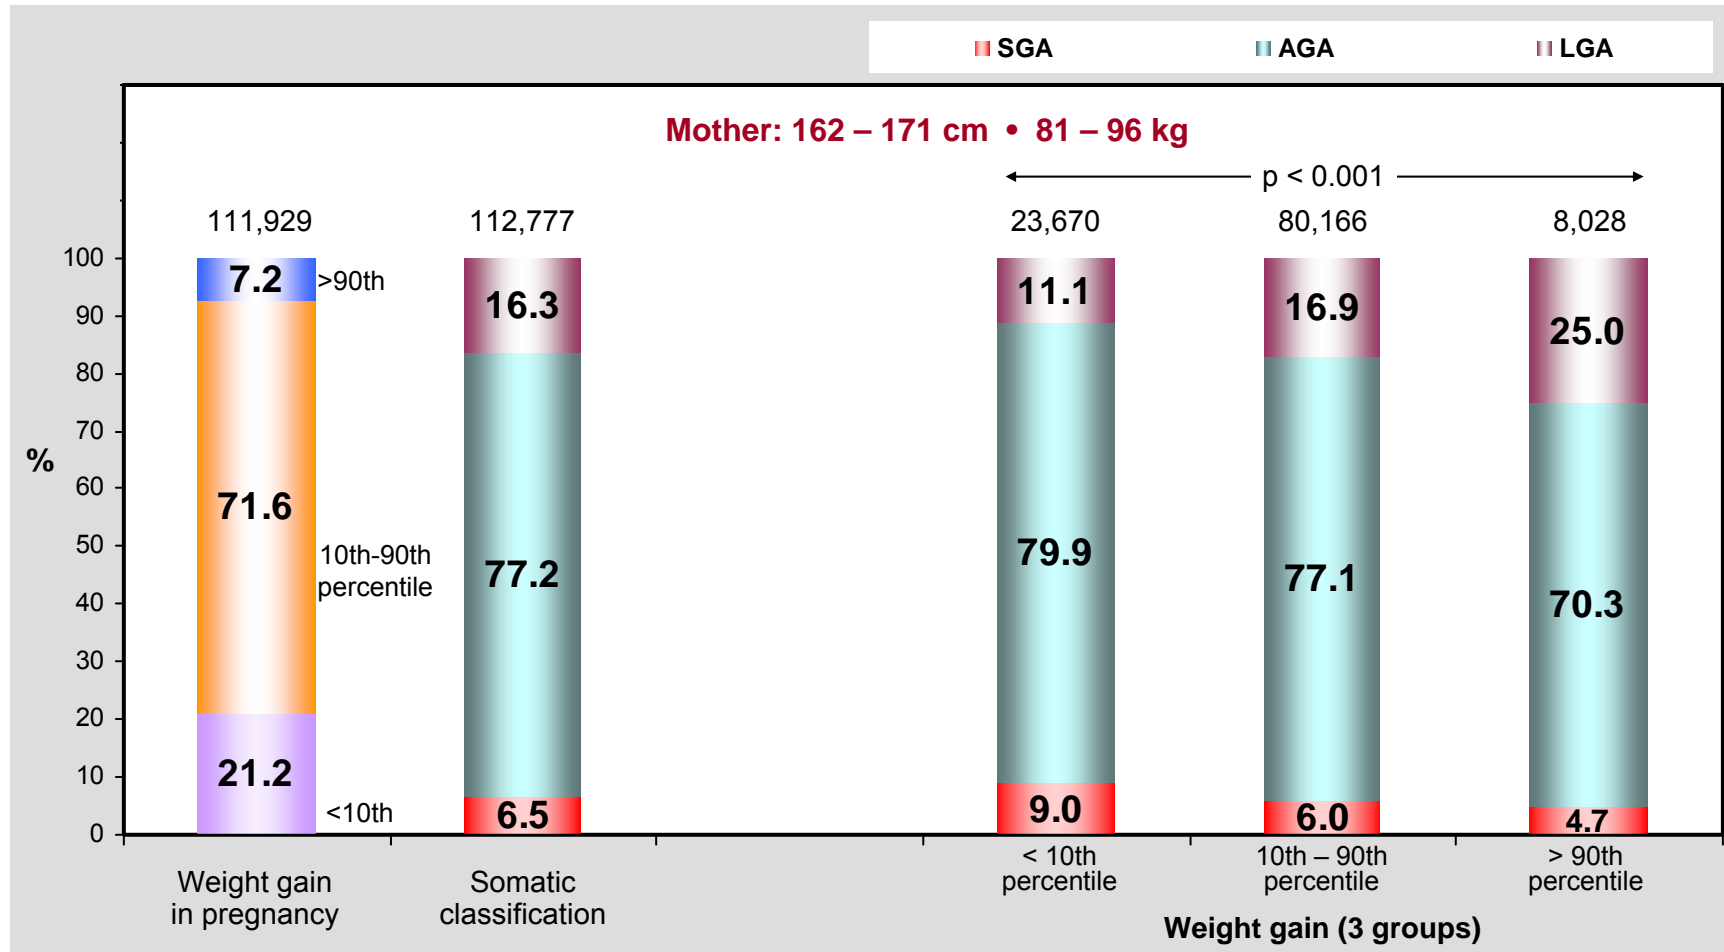

Supplemental Online Figure 1d

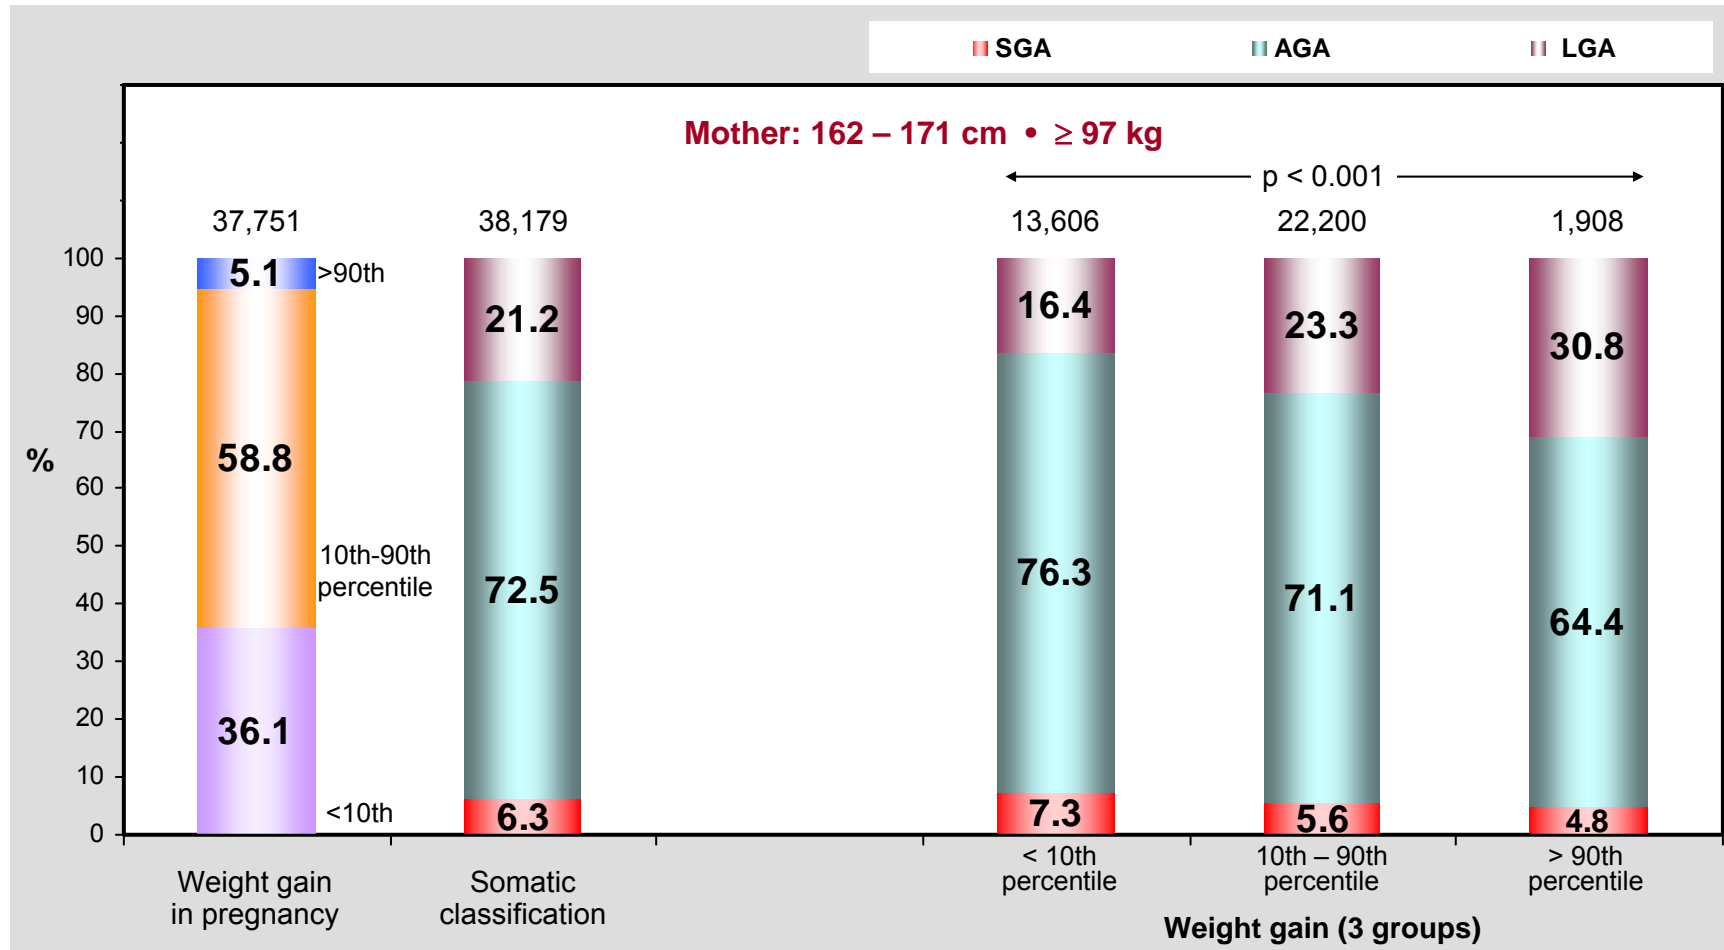

**Fig. 2S** Classifications based on weight gain and birth weight percentiles calculated from the total study population for women with a height  $\geq 172$  cm and their neonates. Details are analogous to the description in the legend to Fig. 1 (in the main paper).

**Supplemental Online Figure 2a**

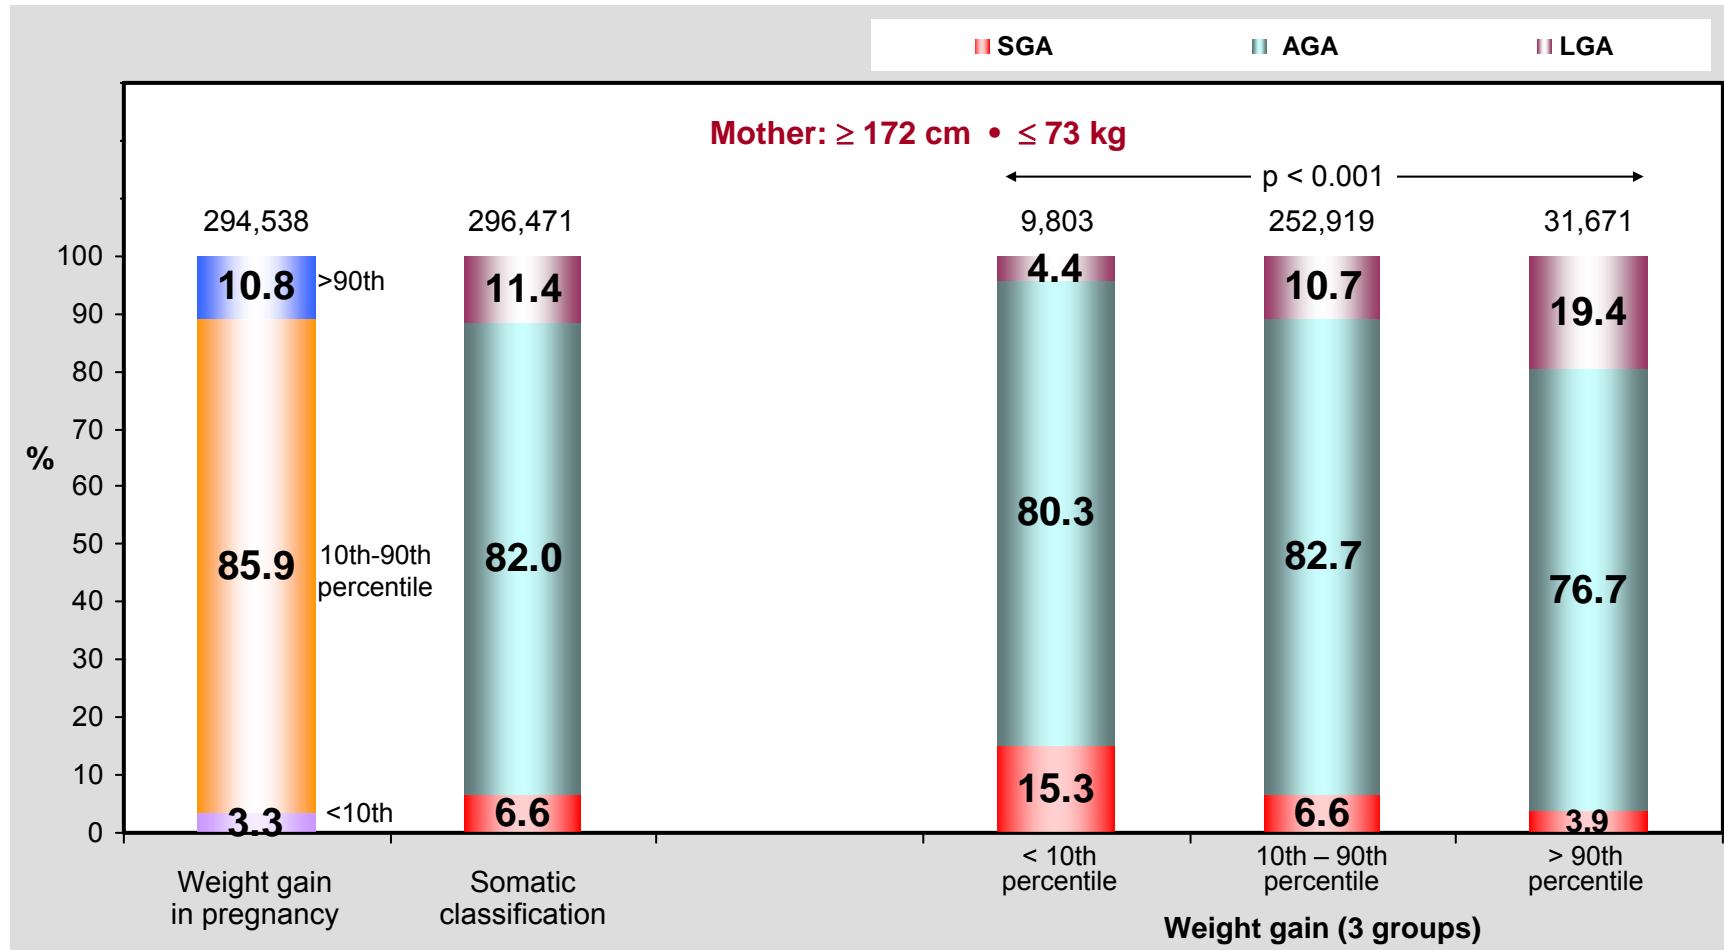

Supplemental Online Figure 2b

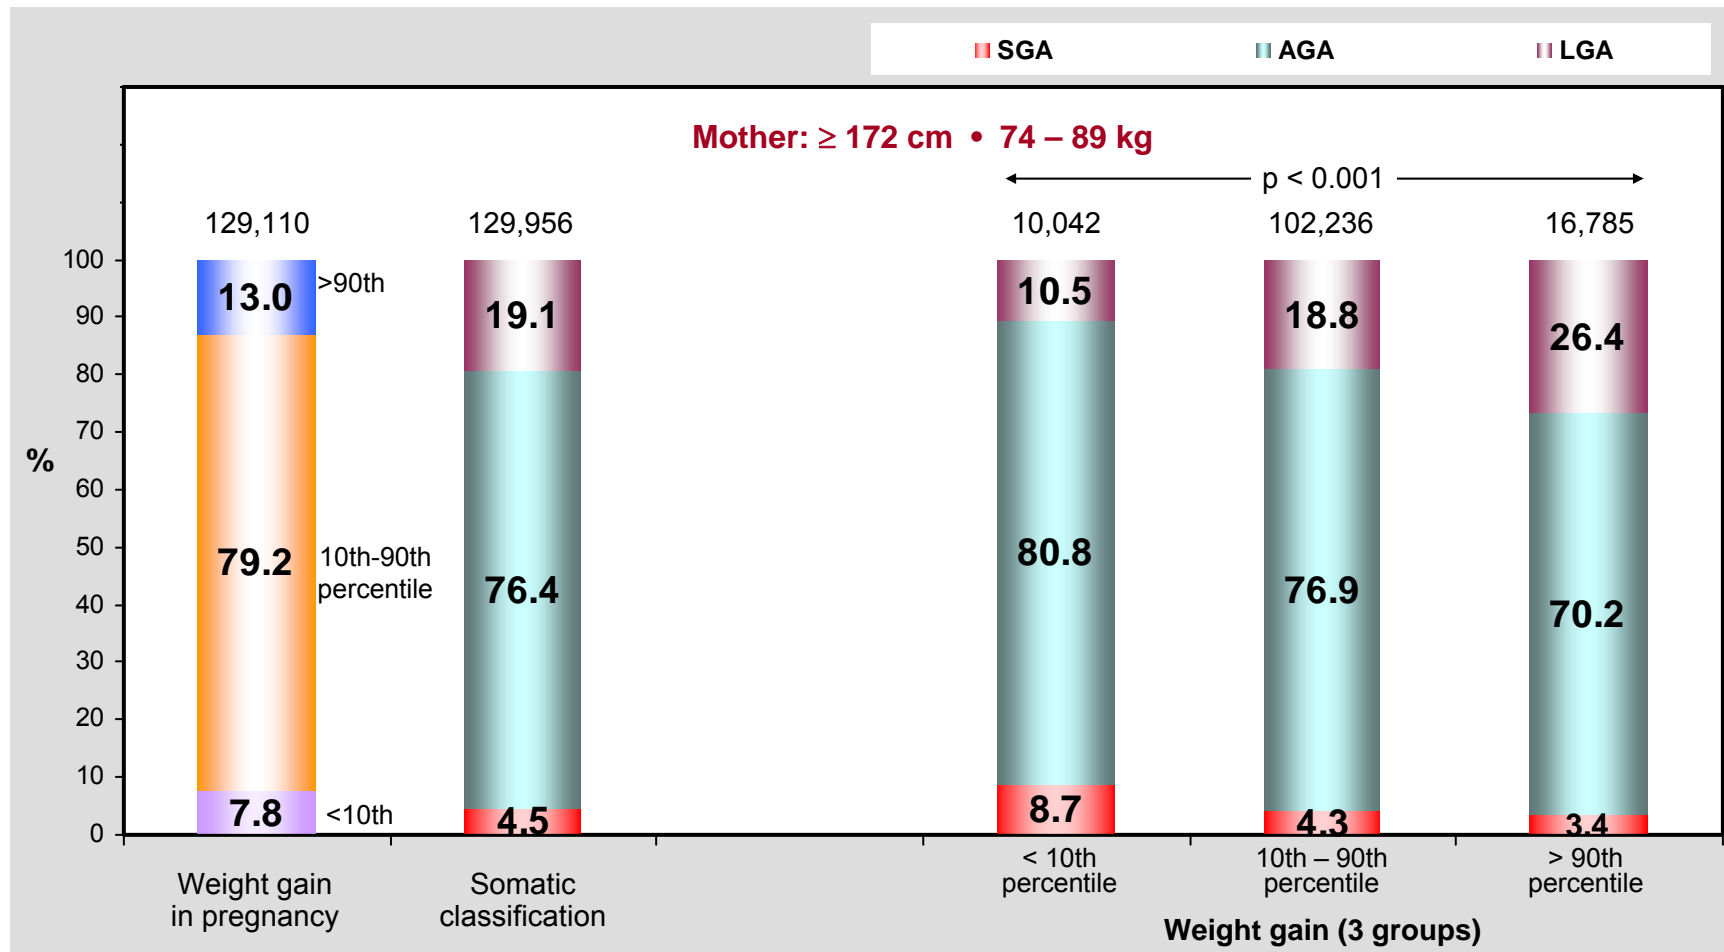

Supplemental Online Figure 2c

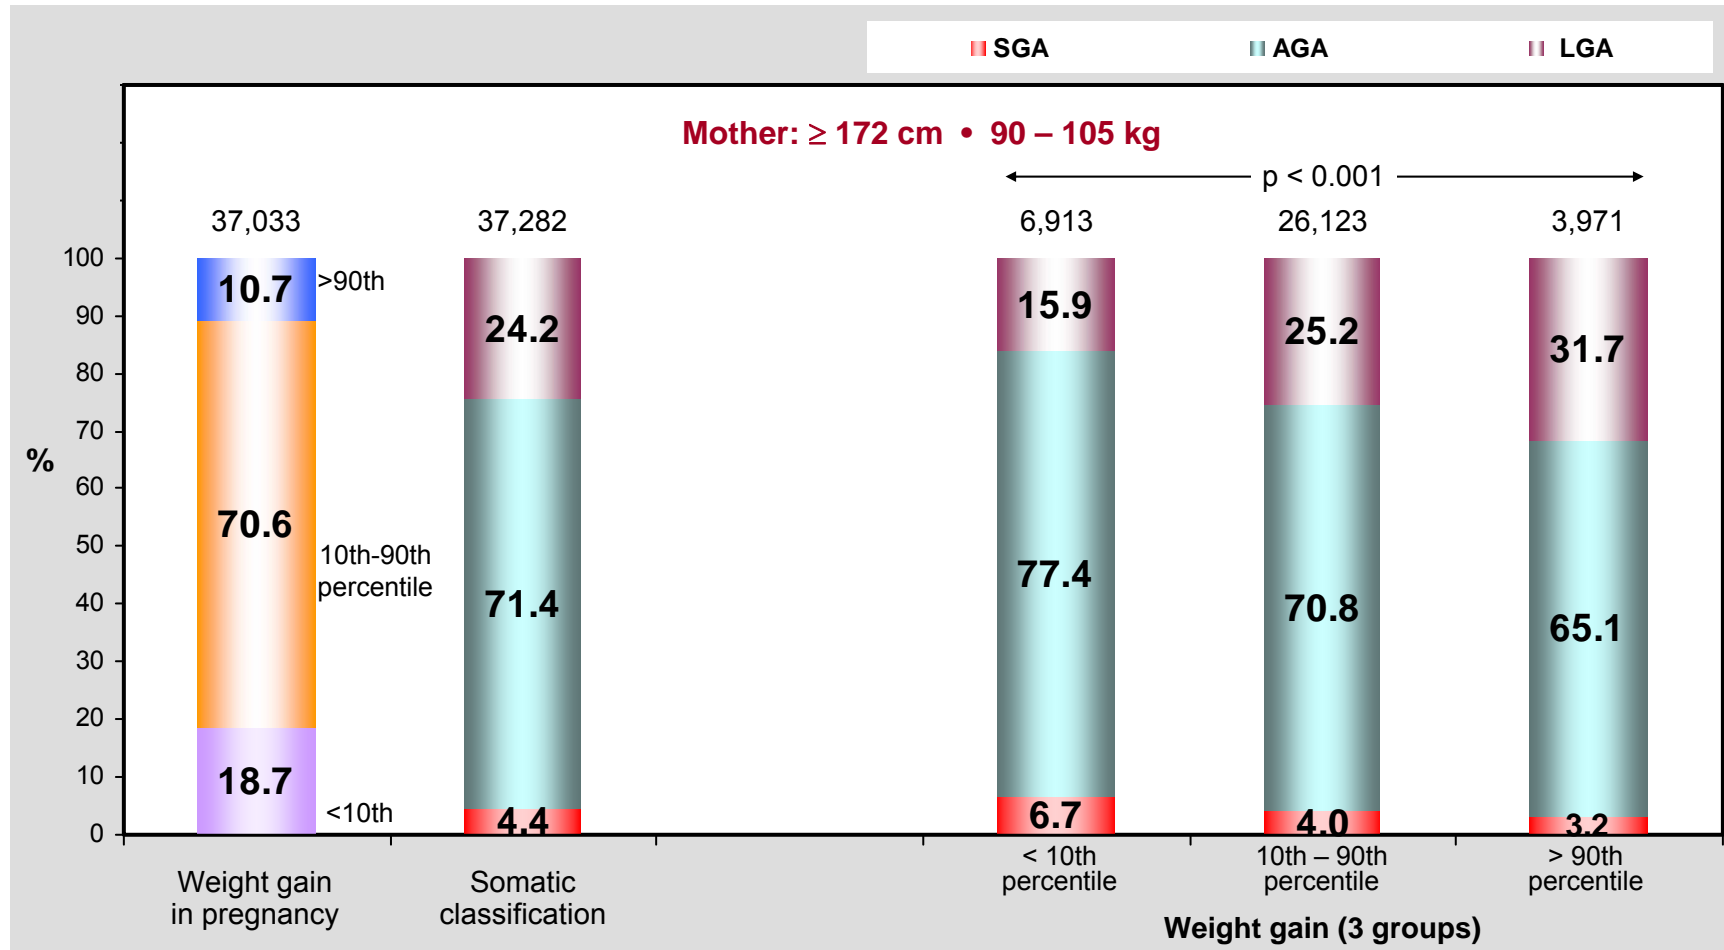

Supplemental Online Figure 2d

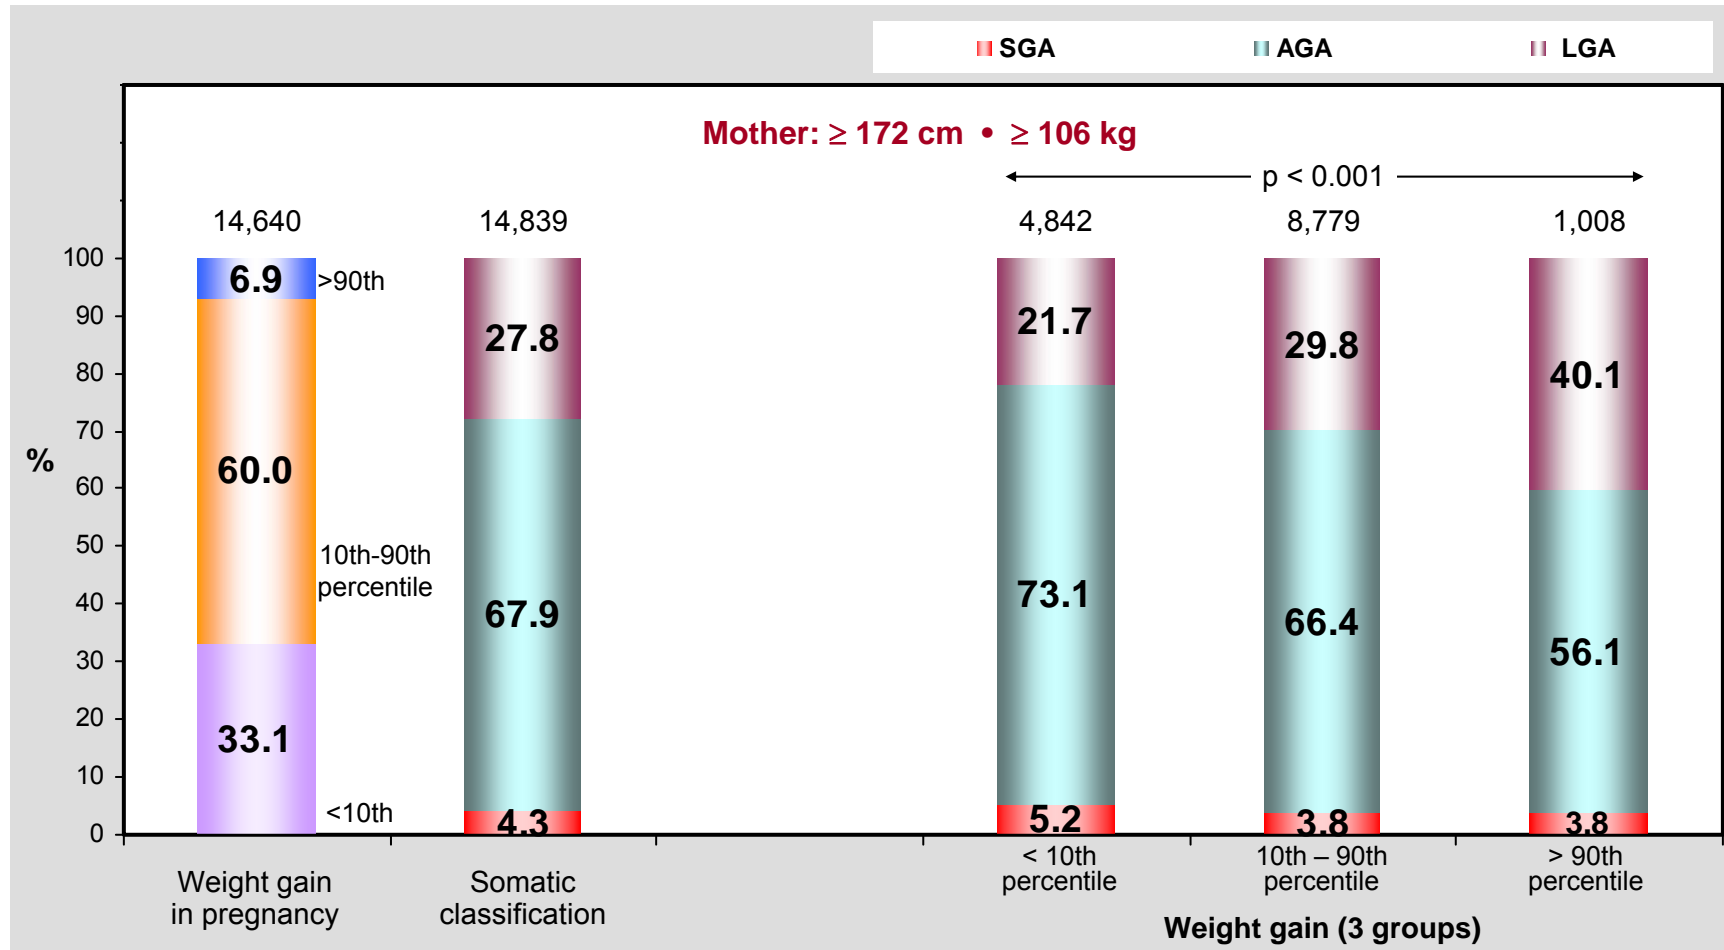



**Fig. 3S** Classifications based on weight gain and birth weight percentiles calculated specifically for the maternal height and weight groups in question for women with a height of 162-171 cm and their neonates. Details are analogous to the description in the legend to Fig. 1 (in the main paper).

**Supplemental Online Figure 3a**

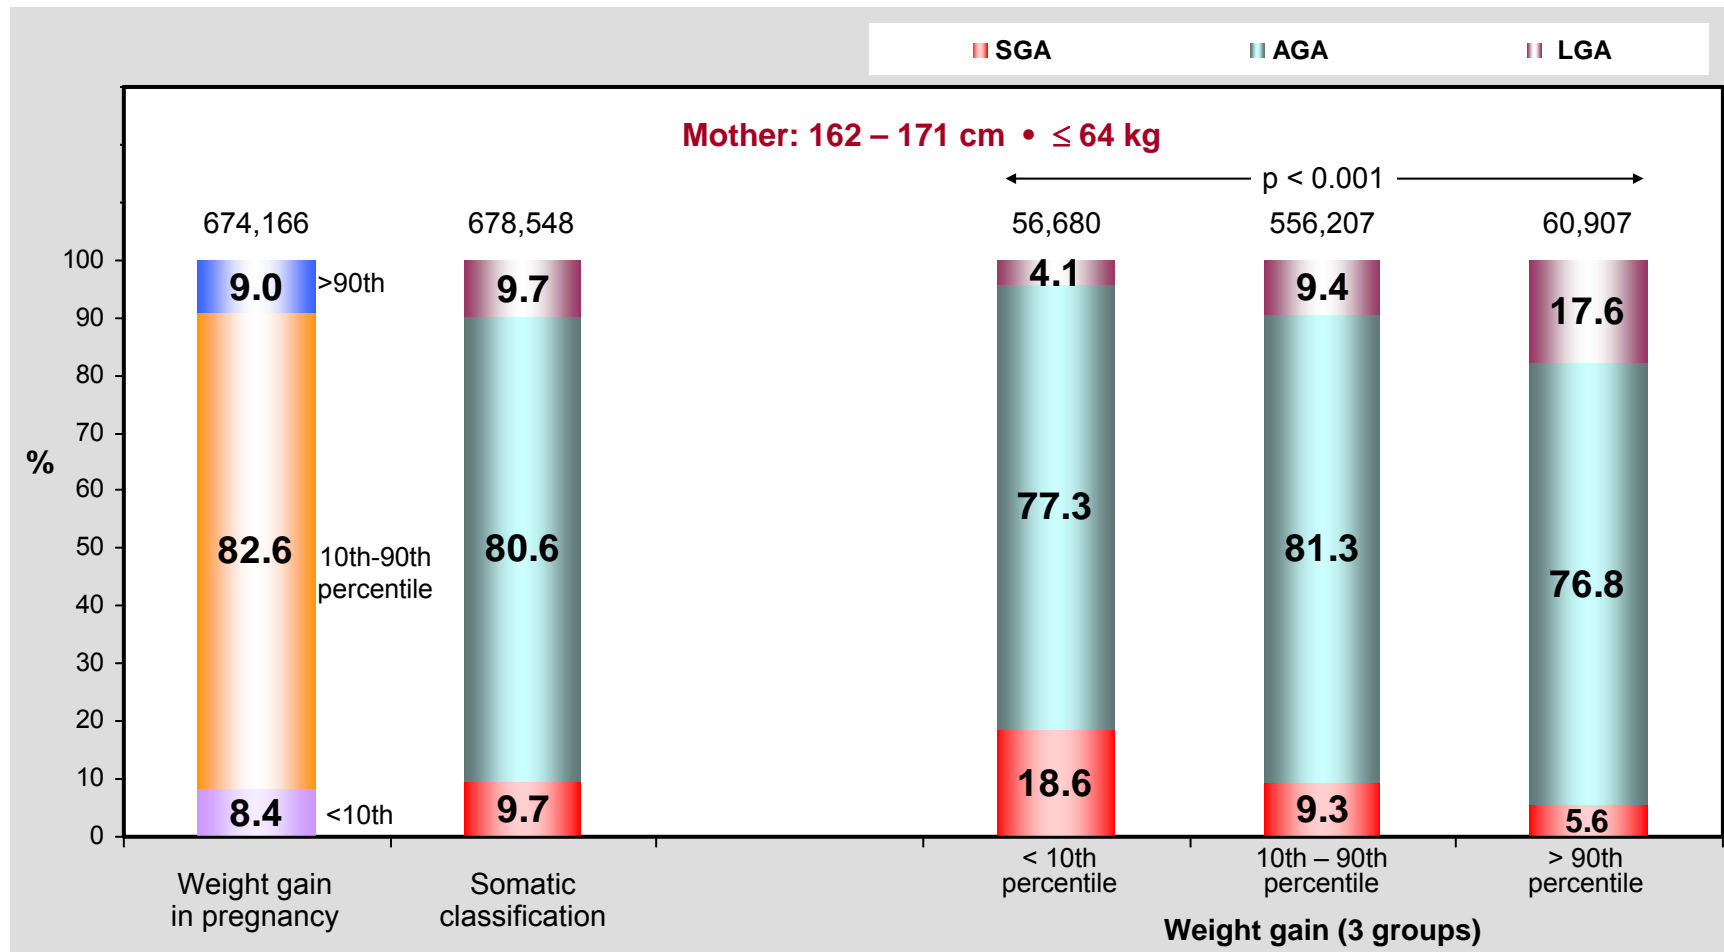

Supplemental Online Figure 3b

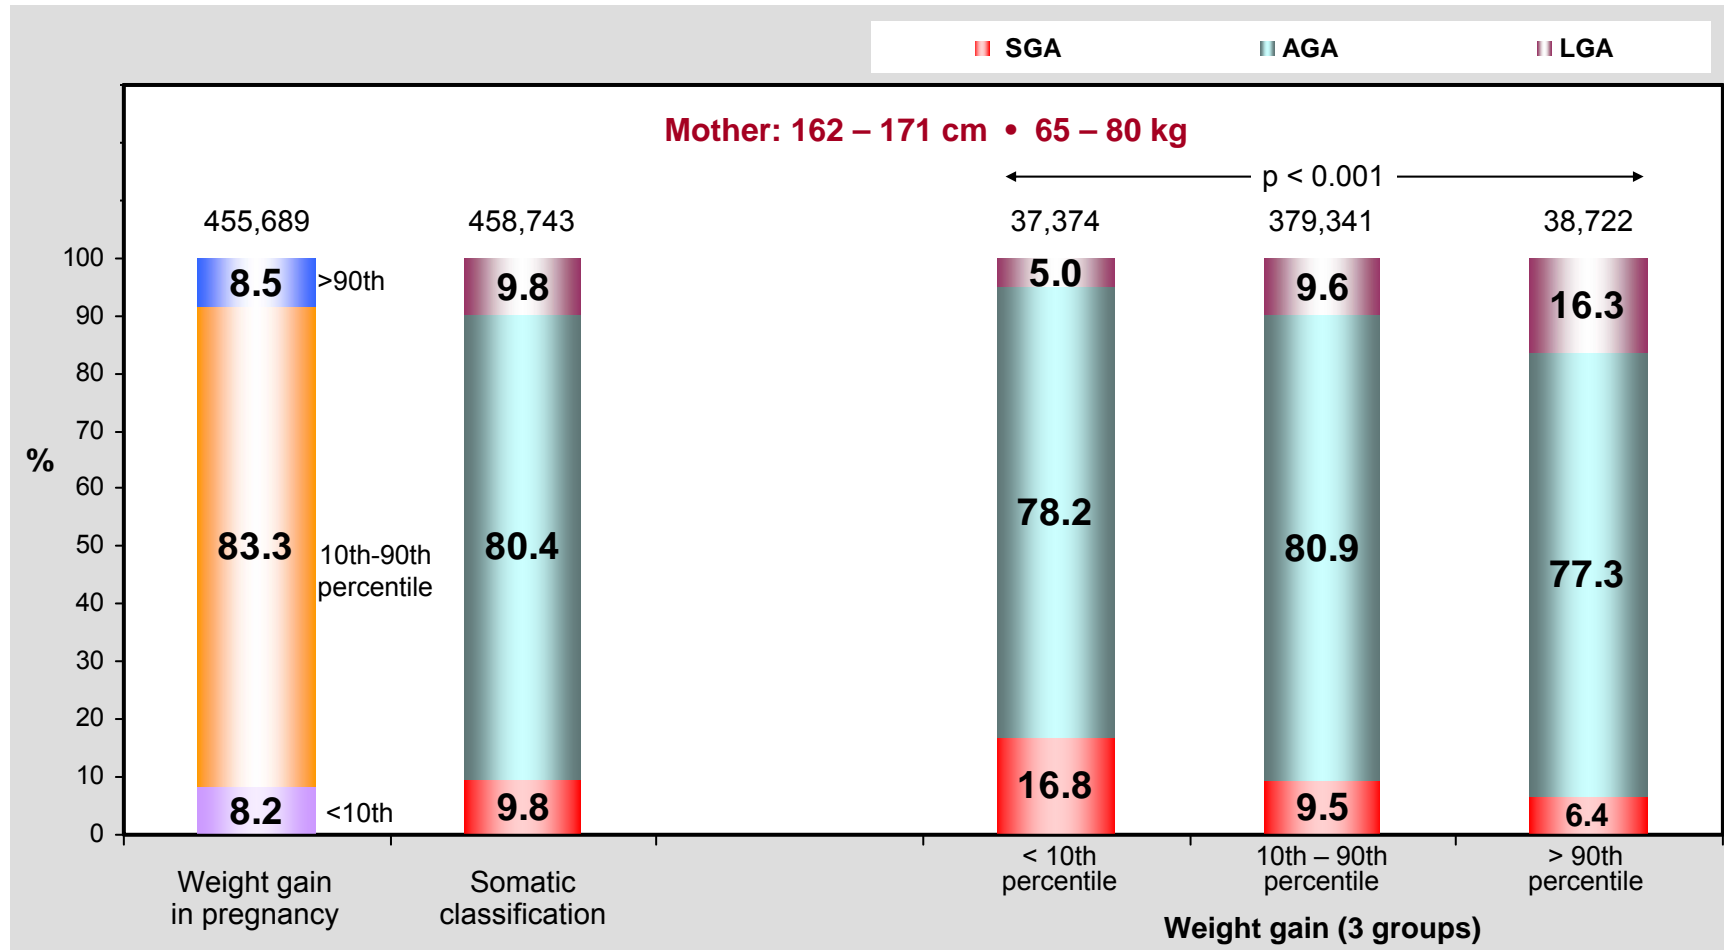

Supplemental Online Figure 3c

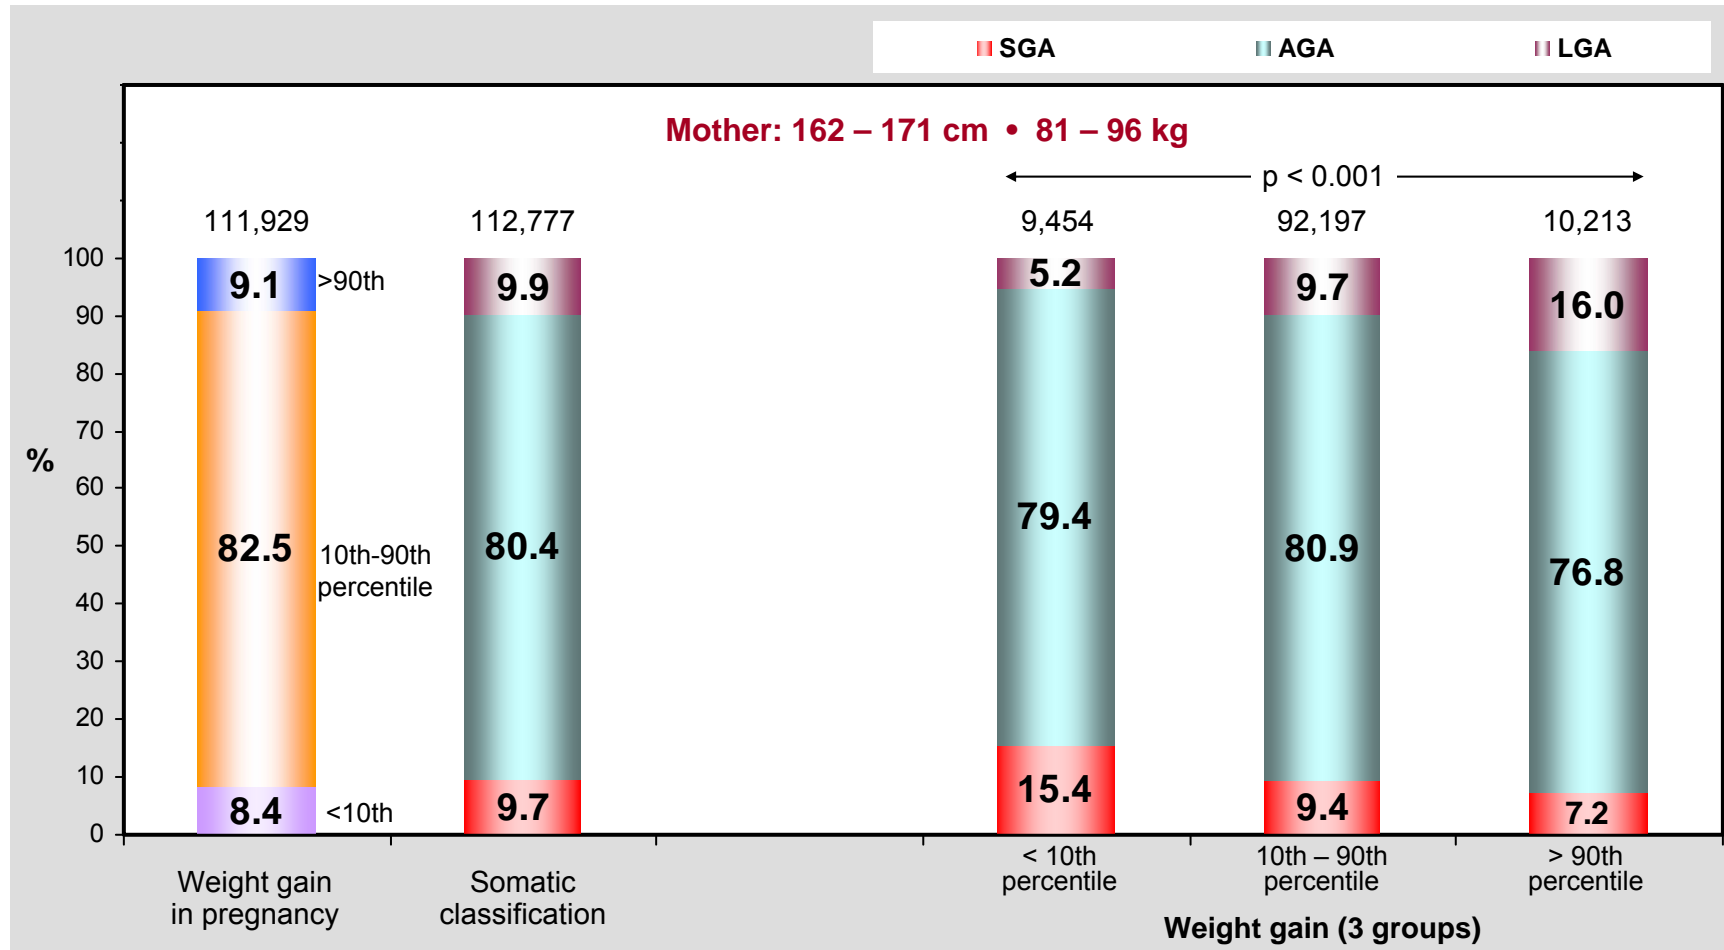

Supplemental Online Figure 3d

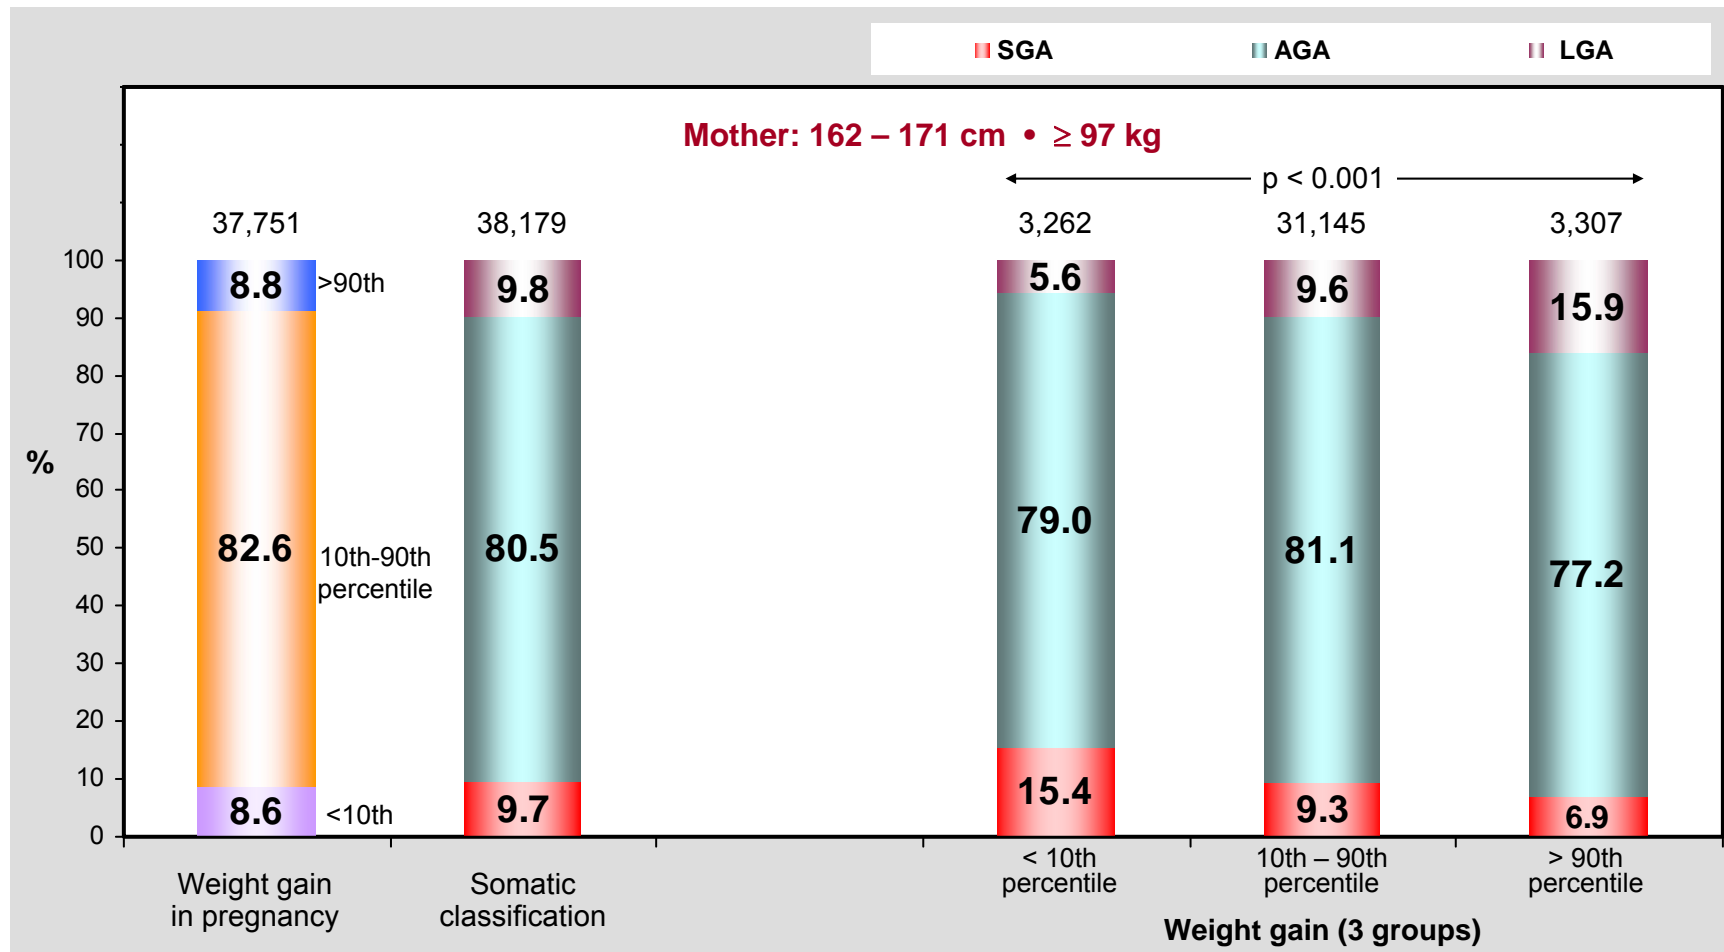

**Fig. 4S** Classifications based on weight gain and birth weight percentiles calculated specifically for the maternal height and weight groups in question for women with a height  $\geq 172$  cm and their neonates. Details are analogous to the description in the legend to Fig. 1 (in the main paper).

**Supplemental Online Figure 4a**

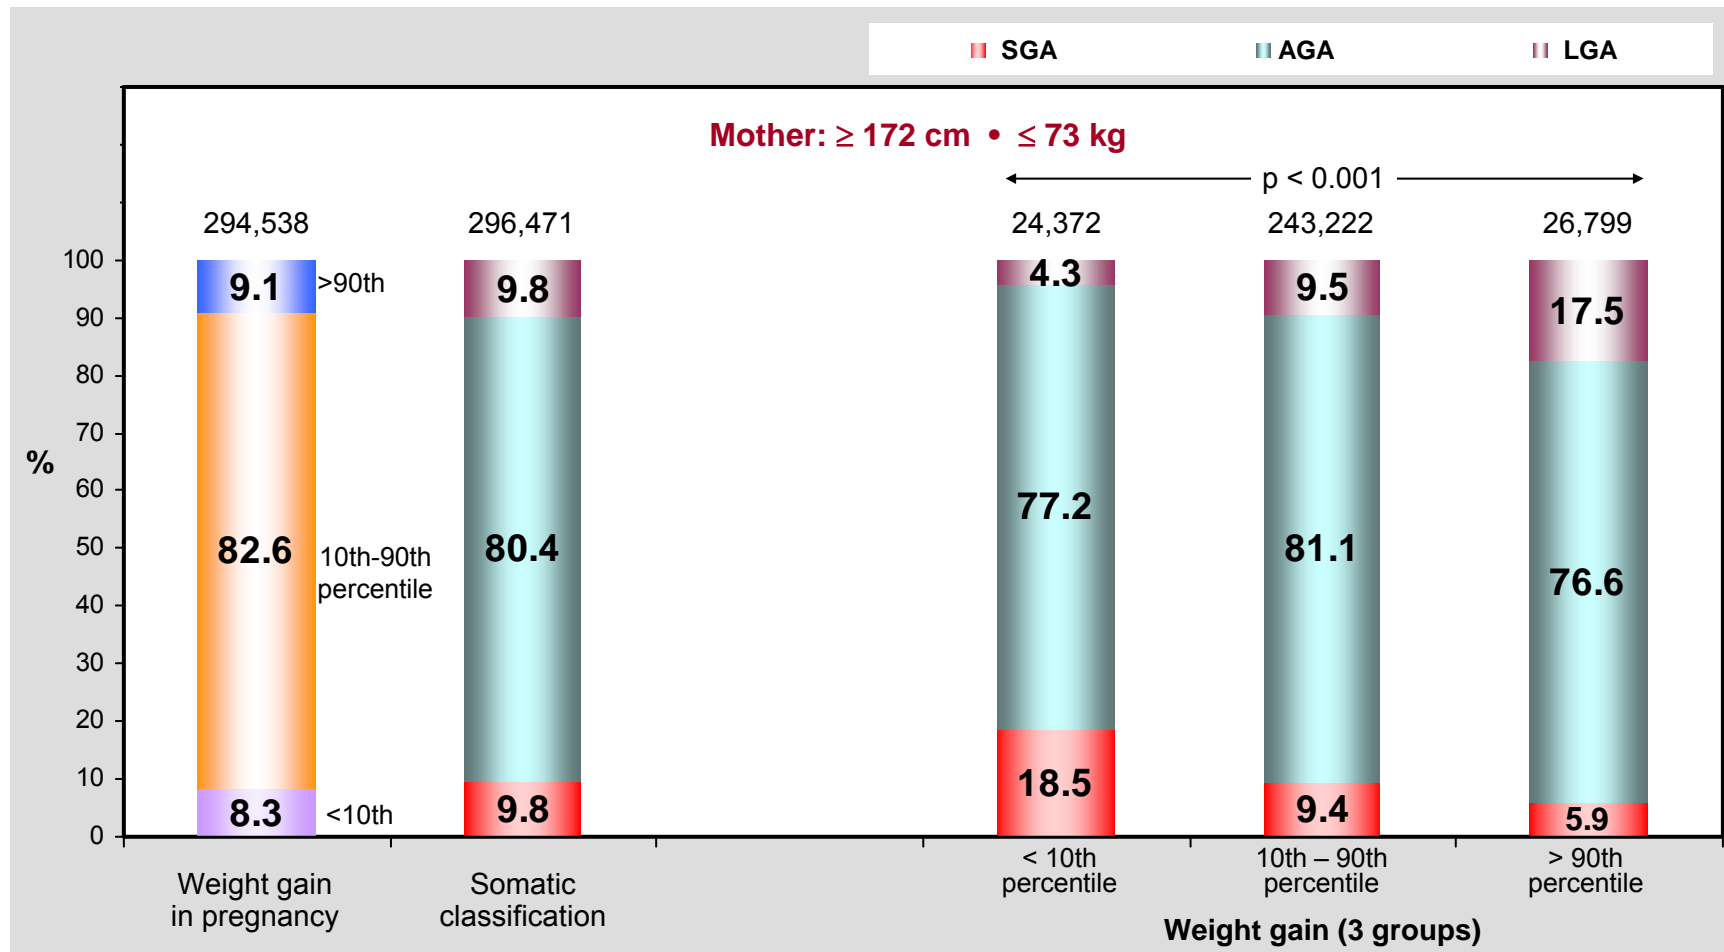

Supplemental Online Figure 4b

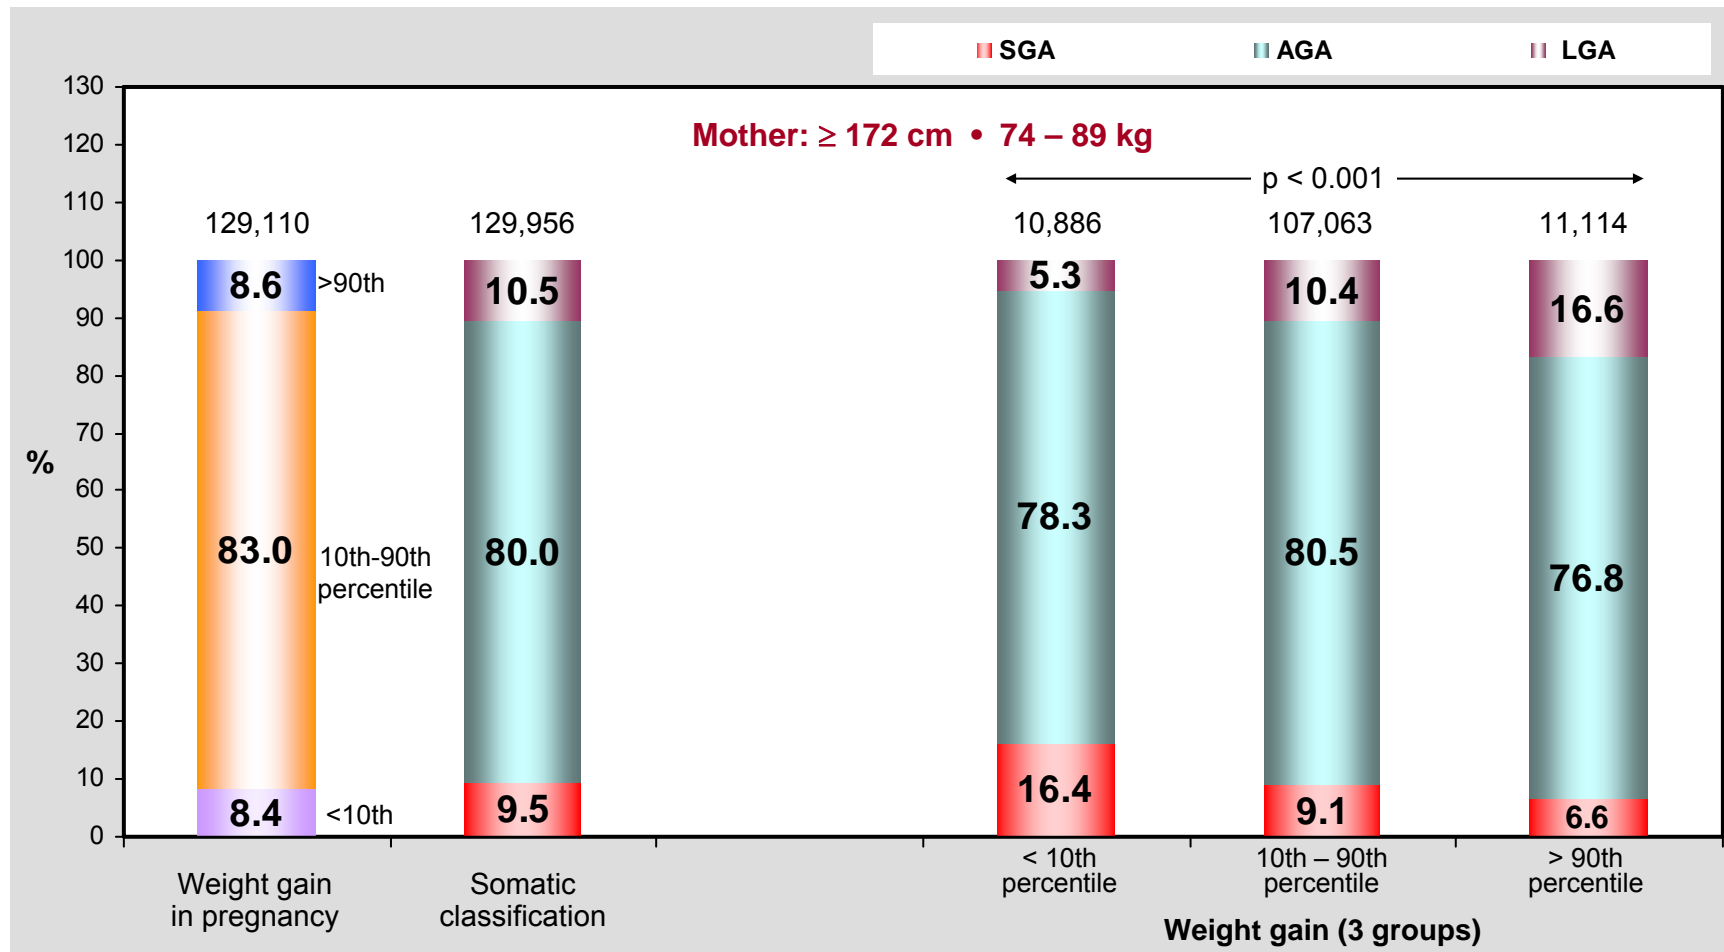

Supplemental Online Figure 4c

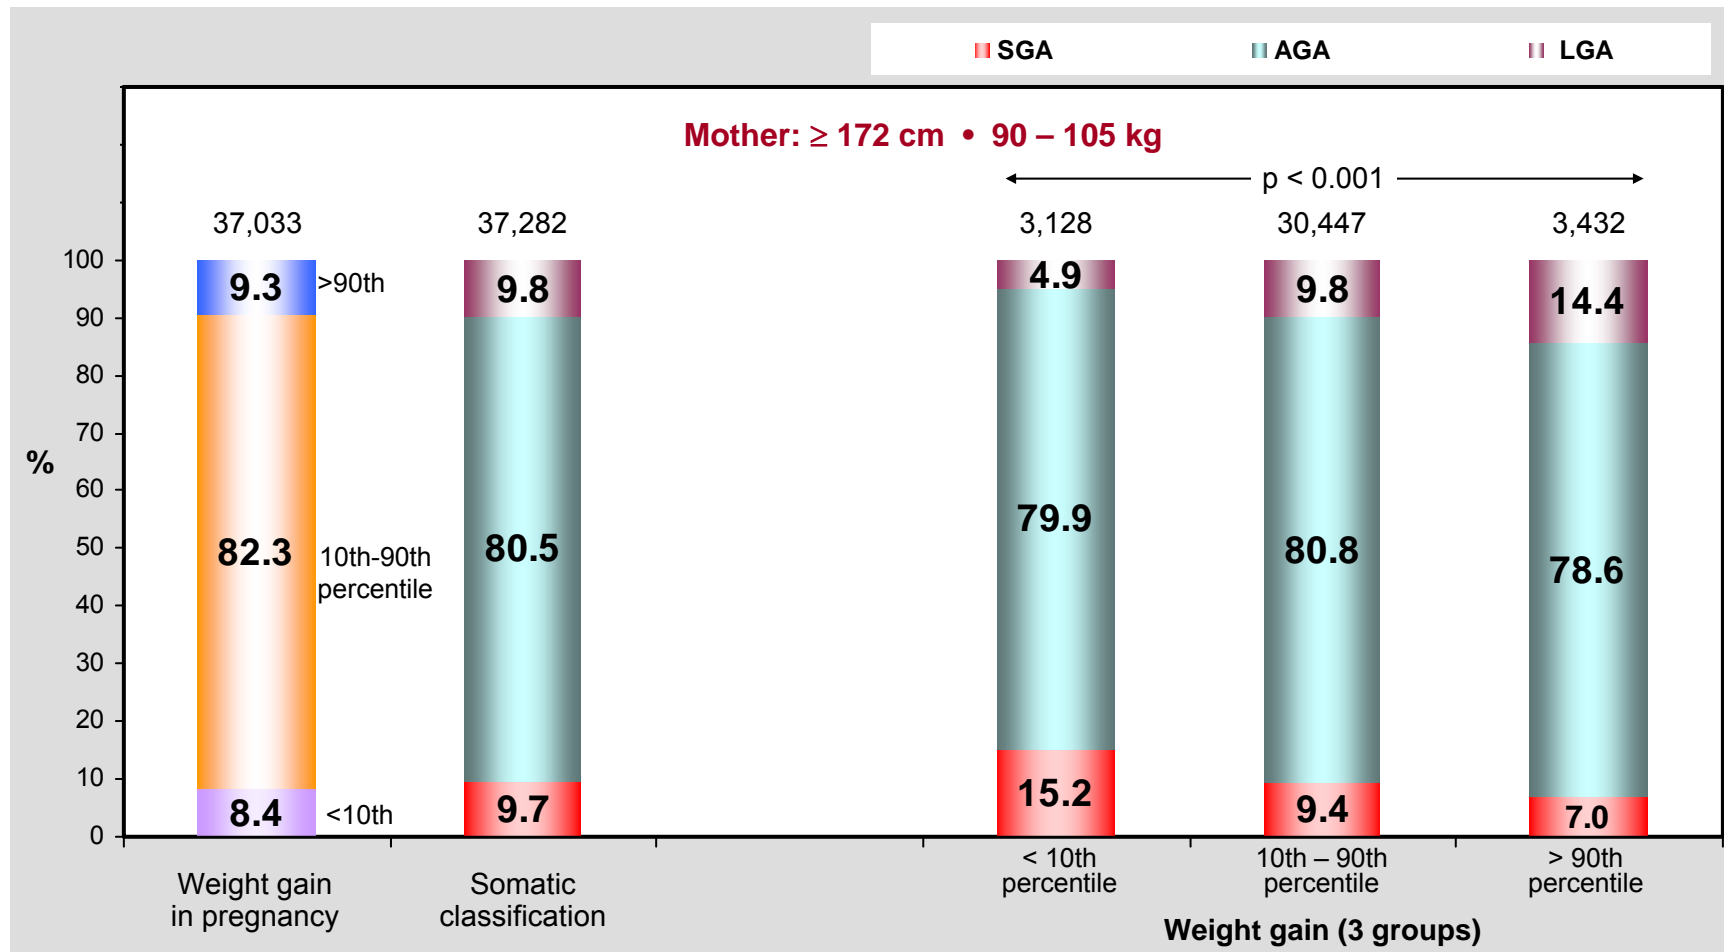

Supplemental Online Figure 4d

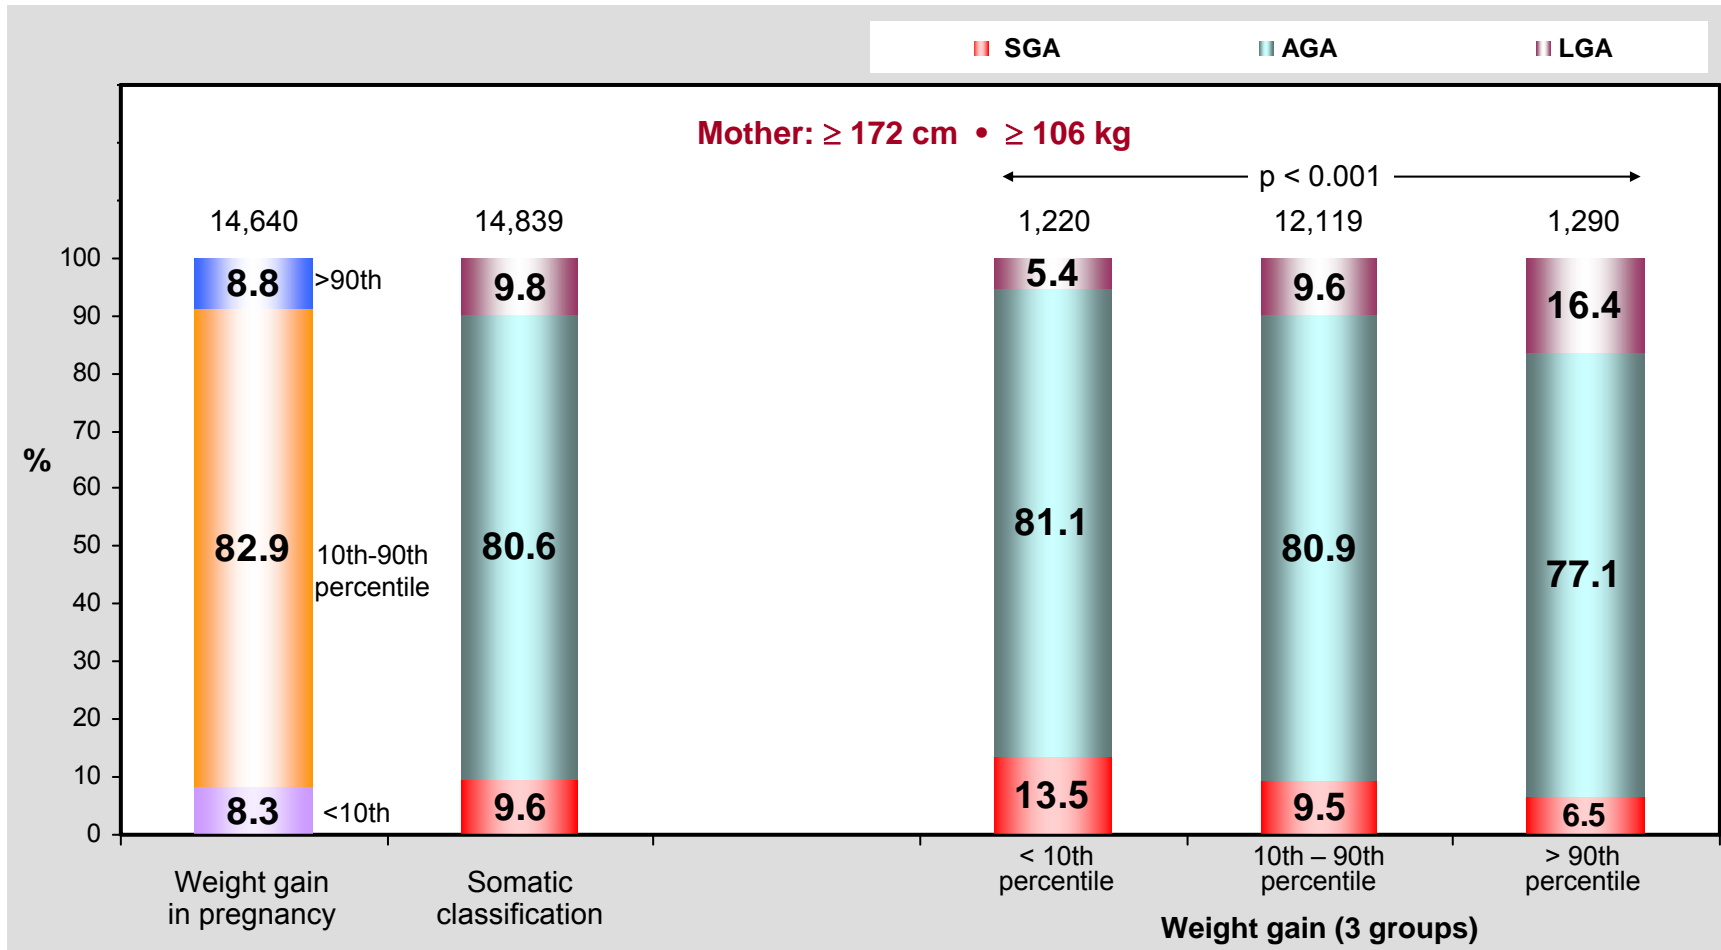

Supplement: 10-1055-s-0032-1328436-sup_gf613.pdf [file 10-1055-s-0032-1328436-sup_gf613.pdf]
